# Supplementary figures and images for: Myelination generates aberrant ultrastructure that is resolved by microglia
Source: PubMed Central journal article supplement — J Cell Biol. 2023 Jan 13;222(3):e202204010. doi: 10.1083/jcb.202204010 (PMC9856851; doi:10.1083/jcb.202204010), 2023-01-13

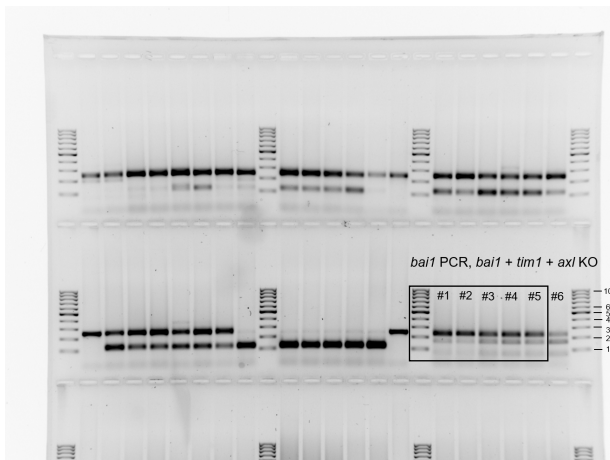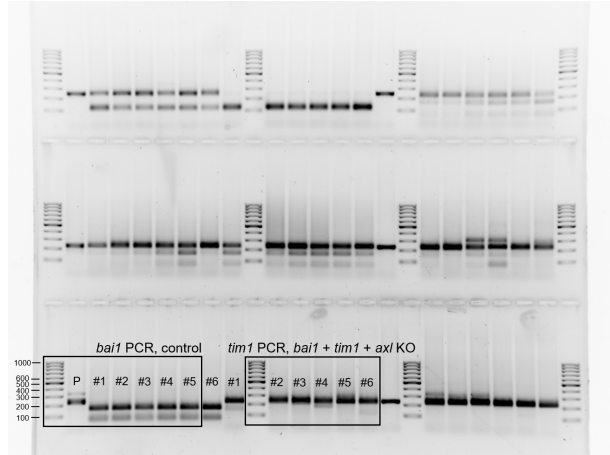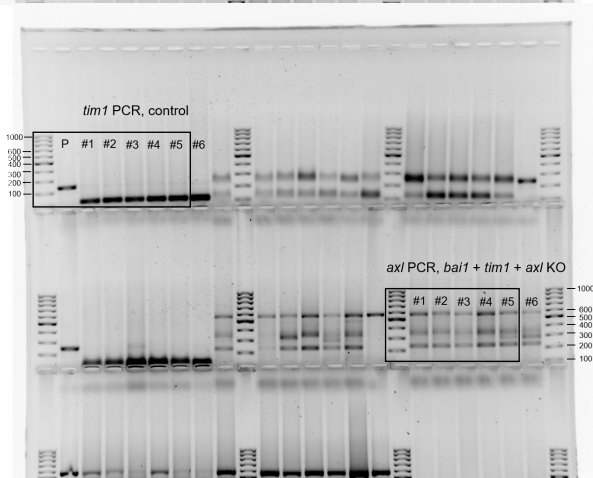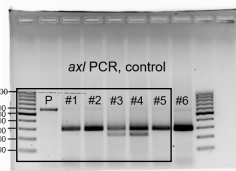

Supplement: JCB_202204010_SourceDataFS4.pdf [file JCB_202204010_SourceDataFS4.pdf]
